# Supplementary figures and images for: One-pot synthesis of cyclohexylamine and N-aryl pyrroles via hydrogenation of nitroarenes over the Pd0.5Ru0.5-PVP catalyst
Source: Royal Society of Chemistry journal article supplement (doi:10.1039/d1nj00922b), 2021-01-01

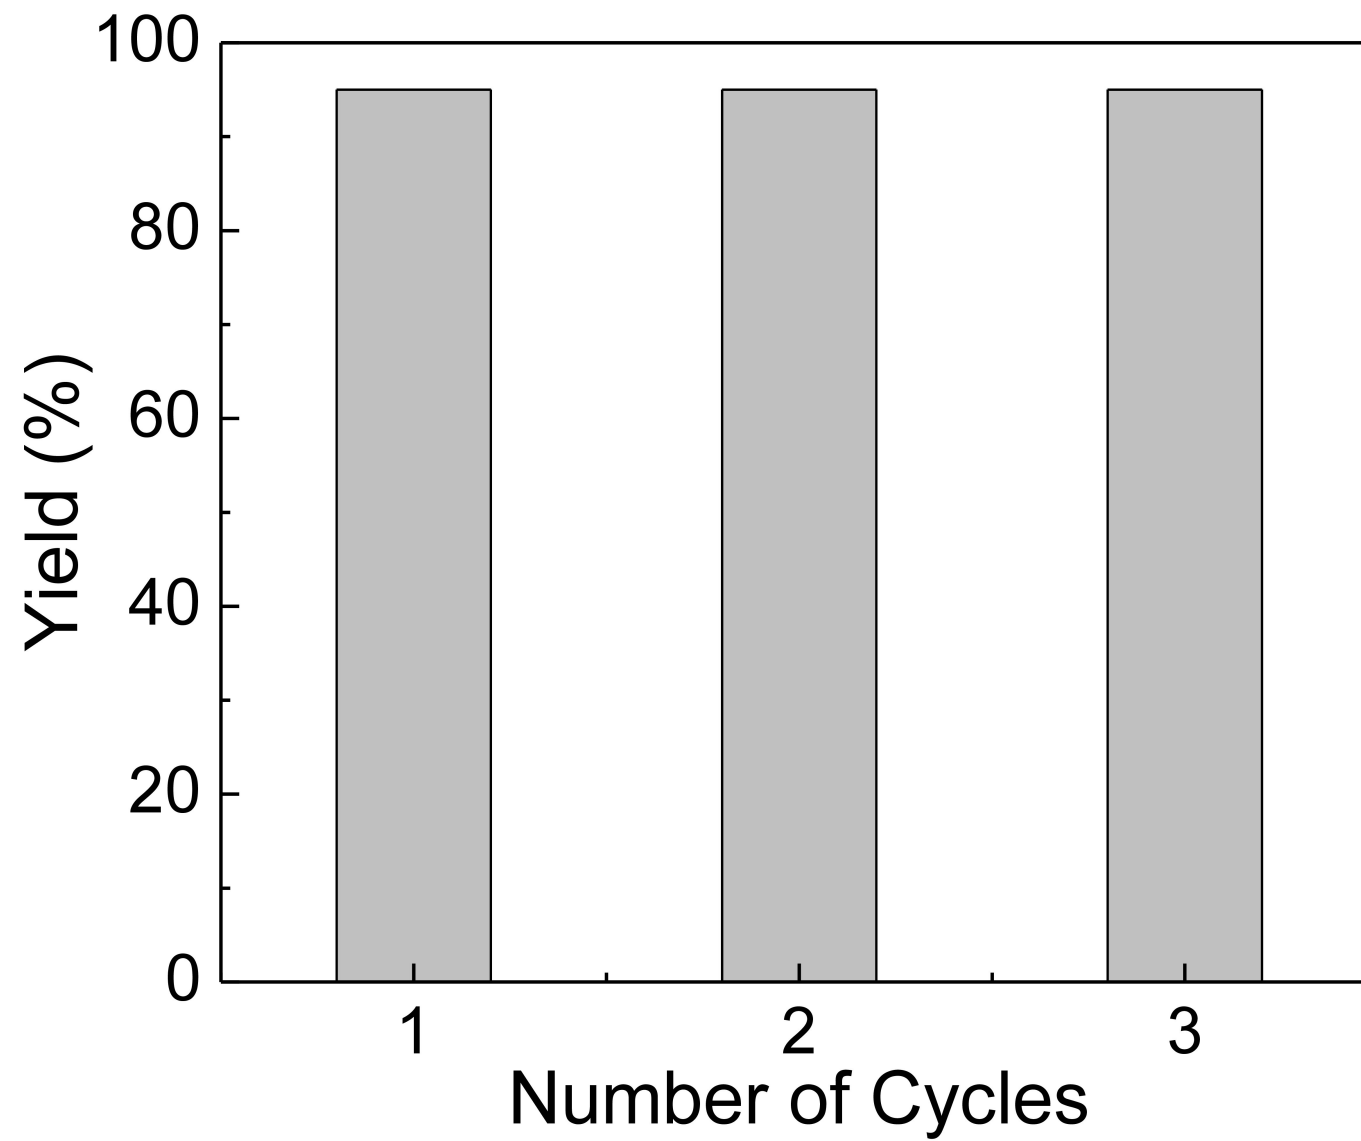

Supplement: d1nj00922b1.pdf [file d1nj00922b1.pdf]
